# Supplementary material for: HDAC3-mediated silencing of miR-451 decreases chemosensitivity of patients with metastatic castration-resistant prostate cancer by targeting NEDD9
Source: PubMed Central journal article supplement — Ther Adv Med Oncol. 2018 Jul 11;10:1758835918783132. doi: 10.1177/1758835918783132 (PMC6048672; doi:10.1177/1758835918783132), 2018-07-11
Supplement: supplementary_table_1.pdf [file supplementary_table_1.pdf]

### Supplementary Table 1. Primers for sh-RNA and pcDNA experiments

---

| <b>name</b>        | <b>primer sequences</b>                                                                                                                    |
|--------------------|--------------------------------------------------------------------------------------------------------------------------------------------|
| <b>sh NEDD9 #1</b> | <b>F 5'- CACCGGGACCTTCTCGCTTTCATCTCGAAAGATGAAAGCGAGAAGGTCCC -3'</b><br><b>R 5'- AAAAGGGACCTTCTCGCTTTCATCTTTCGAGATGAAAGCGAGAAGGTCCC -3'</b> |
| <b>sh NEDD9 #2</b> | <b>F 5'- CACCGCTTTCATCTAGCGCTGCACTCGAAAGTGCAGCGCTAGATGAAAGC -3'</b><br><b>R 5'- AAAAGCTTTCATCTAGCGCTGCACTTTCGAGTGCAGCGCTAGATGAAAGC -3'</b> |
| <b>sh NEDD9 #3</b> | <b>F 5'- CACCACCGCAGTGCTTAATGCTGTCCGAAGACAGCATTAAAGCACTGCGG -3'</b><br><b>R 5'- AAAACCGCAGTGCTTAATGCTGTCTTCGGACAGCATTAAAGCACTGCGGT -3'</b> |
| <b>sh-control</b>  | <b>F 5'-CACCGTTCTCCGAACGTGTCACGTTTCAAGAGAACGTGACACGTTCCGGAG-3'</b><br><b>R 5'-GATCCAAAAAATTCTCCGAACGTGTCACGTTCTCTTGAACGTGACACGT -3'</b>    |
| <b>pcDNA-NEDD9</b> | <b>F 5'-CGGGGTACCTGTGTGCACTGAGGATGACAACTTGCTGTGTGCCACGA-3'</b><br><b>R 5'-CCCAAGCTTCAAAGCCCGTGGAGAATGACATCTCGAAGTGGAAGCCCT-3'</b>          |

---
