# Supplementary material for: HDAC3-mediated silencing of miR-451 decreases chemosensitivity of patients with metastatic castration-resistant prostate cancer by targeting NEDD9
Source: PubMed Central journal article supplement — Ther Adv Med Oncol. 2018 Jul 11;10:1758835918783132. doi: 10.1177/1758835918783132 (PMC6048672; doi:10.1177/1758835918783132), 2018-07-11
Supplement: supplementary_table_2.pdf [file supplementary_table_2.pdf]

## Supplementary Table 2. Primers for promoter experiments

| name                                                  | primer sequences                                 |
|-------------------------------------------------------|--------------------------------------------------|
| <b>Primers for miR-451 promoter construct:</b>        |                                                  |
| (-2370/0) miR-451, (KpnI) F:                          | 5'-CGGGGTACCTCTGCCTCCTCAGGCCAAGG-3'              |
| (-826/0) miR-451, (KpnI) F:                           | 5'-CGGGGTACCGAAACCTTCCACTAGGGATC-3'              |
| (-416/0) miR-451, (KpnI) F:                           | 5'-CGGGGTACCAGCTTGAGGGACAGATCCTC-3'              |
| (-278/0) miR-451, (KpnI) F:                           | 5'-CGGGGTACCAGCAGGGAGCAGGAAGCTGT-3'              |
| (-210/0) miR-451, (KpnI) F:                           | 5'-CGGGGTACCGCTTTTCAAGCCATGCTTCC-3'              |
|                                                       | (HindIII) R: 5'-CCCAAGCTTGTGCCCTGGCAGTCAGTAGG-3' |
| <b>Primers for miR-451 promoter site mutagenesis:</b> |                                                  |
| Binding site 2 mutation F:                            | 5'-CAGGAAAAGTGCCTTACCCAGGGGAGGGAC-3'             |
|                                                       | R: 5'-TCCCCTGGGTAAGGCACTTTTCCTGGCCCTGC-3'        |
| Binding site 4 mutation F:                            | 5'-CTGTCCTGTTCTGCCCGGAGCCCCTCACAGT-3'            |
|                                                       | R: 5'-TGTGAGGGGCTCCGGGCAGAACAGGACAGGT-3'         |
