# Supplementary material for: HDAC3-mediated silencing of miR-451 decreases chemosensitivity of patients with metastatic castration-resistant prostate cancer by targeting NEDD9
Source: PubMed Central journal article supplement — Ther Adv Med Oncol. 2018 Jul 11;10:1758835918783132. doi: 10.1177/1758835918783132 (PMC6048672; doi:10.1177/1758835918783132), 2018-07-11
Supplement: supplementary_table_3.pdf [file supplementary_table_3.pdf]

### Supplementary Table 3. Primers for ChIP-PCR

---

| Name                                         | primer sequences                         |
|----------------------------------------------|------------------------------------------|
| <b>Primers for ChIP in miR-451 promoter:</b> |                                          |
| Binding site 1 F:                            | 5'-GAGAGAGCCACAGCTTTGTCCATCTGCCTC-3'     |
|                                              | R: 5'-CTGATGTACTTCTATCACATAATTAACAAC-3'  |
| Binding site 2 F:                            | 5'-CAGTGACCCTTGTCATGGACTCTAGCAGGGC-3'    |
|                                              | R: 5'-AACTGCAGACTGAGGAGGCCTTTGGATGCA -3' |
| Binding site 3 F:                            | 5'-TCTGCATCATTACGCCATCTCTGGCTTGTTT-3'    |
|                                              | R: 5'-CCAGCGTCTCCTTGATTCTGTGGTCAGGCA-3'  |
| Binding site 4 F:                            | 5'-GCCTGCGAGGGAGCTGTAGAGCAGGGAGCA-3'     |
|                                              | R: 5'-ATCCCAGCCAGGGCCCCACTGGGGGCACAG -3' |

---

ChIP: Chromatin immunoprecipitation
