# Supplementary material for: HDAC3-mediated silencing of miR-451 decreases chemosensitivity of patients with metastatic castration-resistant prostate cancer by targeting NEDD9
Source: PubMed Central journal article supplement — Ther Adv Med Oncol. 2018 Jul 11;10:1758835918783132. doi: 10.1177/1758835918783132 (PMC6048672; doi:10.1177/1758835918783132), 2018-07-11
Supplement: supplementary_table_4.pdf [file supplementary_table_4.pdf]

**Supplementary Table 4. Differentially expressed miRNAs in docetaxel-treated prostate cancer cells compared with those of normal control**

| miRNA (miR)  | Fold change | miRNA (miR)    | Fold change |
|--------------|-------------|----------------|-------------|
| LNCap        |             | DU145          |             |
| has-miR-141  | 11.76       | has-miR-494    | 13.53       |
| has-miR-155  | 11.51       | has-miR-25     | 11.14       |
| has-miR-135a | 11.12       | has-miR-21     | 9.27        |
| has-miR-29a  | 10.82       | has-miR-125b   | 9.03        |
| has-miR-153  | 9.95        | has-miR-18a    | 8.66        |
| has-miR-18a  | 9.67        | has-miR-106b   | 8.43        |
| has-miR-629  | 9.05        | has-miR-141    | 8.17        |
| has-miR-125b | 8.77        | has-miR-650    | 7.83        |
| has-miR-21   | 8.24        | has-miR-375    | 7.18        |
| has-miR-19a  | 7.83        | has-miR-4534   | 5.19        |
| has-miR-650  | 7.55        | has-miR-637    | 4.04        |
| has-miR-375  | 6.80        | has-miR-195    | 2.91        |
| has-miR-19b  | 4.34        | has-miR-98     | -2.07       |
| has-miR-221  | 3.25        | has-miR-27a    | -2.14       |
| has-miR-25   | 3.12        | has-miR-224    | -2.37       |
| has-miR-106  | 2.12        | has-miR-14a    | -2.95       |
| has-miR-663  | 2.17        | has-miR-130a   | -3.21       |
| has-miR-145  | -2.19       | has-miR-30a    | -3.33       |
| has-miR-130a | -2.53       | has-miR-452    | -3.87       |
| has-miR-218  | -2.84       | has-miR-204-5p | -4.16       |
| has-miR-31   | - 3.25      | has-miR-145    | -4.55       |

|                 |       |             |       |
|-----------------|-------|-------------|-------|
| has-miR-125a-3p | -3.48 | has-miR-372 | -4.71 |
| has-miR-214     | -3.51 | has-miR-218 | -4.82 |
| has-miR-34a     | -3.74 | has-miR-451 | -5.54 |
| has-miR-26a     | -4.27 | has-miR-24  | -5.63 |
| has-miR-24      | -4.55 | has-miR-222 | -5.72 |
| has-miR-100     | -4.79 |             |       |
| has-miR-205     | -5.13 |             |       |
| has-miR-451     | -5.91 |             |       |

---
