# Supplementary material for: HDAC3-mediated silencing of miR-451 decreases chemosensitivity of patients with metastatic castration-resistant prostate cancer by targeting NEDD9
Source: PubMed Central journal article supplement — Ther Adv Med Oncol. 2018 Jul 11;10:1758835918783132. doi: 10.1177/1758835918783132 (PMC6048672; doi:10.1177/1758835918783132), 2018-07-11
Supplement: supplementary_table_5.pdf [file supplementary_table_5.pdf]

**Supplementary table 5. Correlations between miR-451 and NEDD9 and clinicopathological characteristics of mCRPC patients**

| Variables                    | miR-451 expression |            | <i>P</i> -value | NEDD9 expression |            | <i>P</i> -value |
|------------------------------|--------------------|------------|-----------------|------------------|------------|-----------------|
|                              | High (n=24)        | Low (n=35) |                 | High (n=32)      | Low (n=27) |                 |
| Age (years)                  |                    |            | 0.603           |                  |            | 0.971           |
| <65                          | 8                  | 14         |                 | 12               | 10         |                 |
| ≥65                          | 16                 | 21         |                 | 20               | 17         |                 |
| Gleason score                |                    |            | 0.044*          |                  |            | 0.026*          |
| <8                           | 16                 | 14         |                 | 12               | 18         |                 |
| ≥8                           | 8                  | 21         |                 | 20               | 9          |                 |
| PSA before DTX-T<br>( ng/ml) |                    |            | 0.369           |                  |            | 0.850           |
| <200                         | 5                  | 11         |                 | 9                | 7          |                 |
| ≥200                         | 19                 | 24         |                 | 23               | 20         |                 |
| ECOG                         |                    |            | 0.033*          |                  |            | 0.015*          |
| <2                           | 15                 | 12         |                 | 10               | 17         |                 |
| 2                            | 9                  | 23         |                 | 22               | 10         |                 |
| Visceral metastasis          |                    |            | 0.030*          |                  |            | <0.001*         |
| Yes                          | 5                  | 17         |                 | 19               | 3          |                 |
| No                           | 19                 | 18         |                 | 13               | 24         |                 |
| Survival outcome             |                    |            | 0.018*          |                  |            | 0.007*          |
| Live                         | 15                 | 11         |                 | 9                | 17         |                 |
| Death                        | 9                  | 24         |                 | 23               | 10         |                 |

mCRPC: metastatic castration-resistant prostate cancer; ECOG: Eastern Cooperative Oncology Group \**P*<0.05.
