# Supplementary material for: HDAC3-mediated silencing of miR-451 decreases chemosensitivity of patients with metastatic castration-resistant prostate cancer by targeting NEDD9
Source: PubMed Central journal article supplement — Ther Adv Med Oncol. 2018 Jul 11;10:1758835918783132. doi: 10.1177/1758835918783132 (PMC6048672; doi:10.1177/1758835918783132), 2018-07-11
Supplement: supplementary_table_6.pdf [file supplementary_table_6.pdf]

**Supplementary table 6. Univariate and multivariate analysis of variables associated with PFS of mCRPC patients by Cox regression analysis**

| Variables                  | PFS                 |           |         | PFS                   |           |         |
|----------------------------|---------------------|-----------|---------|-----------------------|-----------|---------|
|                            | Univariate analysis |           | P-value | multivariate analysis |           | P-value |
|                            | HR                  | (95%CI)   |         | HR                    | (95%CI)   |         |
| <b>Visceral metastasis</b> |                     |           |         |                       |           |         |
| Yes                        | 1(reference)        |           |         | 1(reference)          |           |         |
| No                         | 0.89                | 0.53-2.12 | 0.034*  | 1.26                  | 0.71-3.08 | 0.041*  |
| <b>Gleason score</b>       |                     |           |         |                       |           |         |
| <8                         | 1(reference)        |           |         | 1(reference)          |           |         |
| ≥8                         | 1.32                | 0.79-2.82 | 0.045*  | 0.91                  | 0.65-3.77 | 0.051   |
| <b>ECOG</b>                |                     |           |         |                       |           |         |
| <2                         | 1(reference)        |           |         | 1(reference)          |           |         |
| 2                          | 0.57                | 0.48-1.79 | 0.031*  | 0.83                  | 0.54-2.97 | 0.044*  |
| <b>miR-451 expression</b>  |                     |           |         |                       |           |         |
| Low                        | 1(reference)        |           |         | 1(reference)          |           |         |
| High                       | 1.21                | 0.47-2.56 | 0.001*  | 0.95                  | 0.74-3.43 | 0.022*  |
| <b>NEDD9 expression</b>    |                     |           |         |                       |           |         |
| Low                        | 1(reference)        |           |         | 1(reference)          |           |         |
| High                       | 0.64                | 0.47-1.98 | 0.002*  | 1.03                  | 0.83-2.66 | 0.033*  |

PFS: progression-free survival; mCRPC: metastatic castration-resistant prostate cancer; HR: hazard ratio; 95%CI: 95%confidence intervals; ECOG: Eastern Cooperative Oncology Group  
\* $P < 0.05$ .
