# Supplementary material for: HDAC3-mediated silencing of miR-451 decreases chemosensitivity of patients with metastatic castration-resistant prostate cancer by targeting NEDD9
Source: PubMed Central journal article supplement — Ther Adv Med Oncol. 2018 Jul 11;10:1758835918783132. doi: 10.1177/1758835918783132 (PMC6048672; doi:10.1177/1758835918783132), 2018-07-11
Supplement: supplementary_table_7.pdf [file supplementary_table_7.pdf]

**Supplementary table 7. Univariate and multivariate analysis of variables associated with OS of mCRPC patients by Cox regression analysis**

| Variables                  | OS                  |           |         | OS                    |           |         |
|----------------------------|---------------------|-----------|---------|-----------------------|-----------|---------|
|                            | Univariate analysis |           | P-value | multivariate analysis |           | P-value |
|                            | HR                  | (95%CI)   |         | HR                    | (95%CI)   |         |
| <b>Visceral metastasis</b> |                     |           |         |                       |           |         |
| Yes                        | 1(reference)        |           |         | 1(reference)          |           |         |
| No                         | 1.13                | 0.79-3.55 | 0.021*  | 0.78                  | 0.56-2.84 | 0.033*  |
| <b>Gleason score</b>       |                     |           |         |                       |           |         |
| <8                         | 1(reference)        |           |         | 1(reference)          |           |         |
| ≥8                         | 0.85                | 0.46-2.33 | 0.032*  | 1.34                  | 0.79-4.14 | 0.046*  |
| <b>ECOG</b>                |                     |           |         |                       |           |         |
| <2                         | 1(reference)        |           |         | 1(reference)          |           |         |
| 2                          | 0.94                | 0.63-2.68 | 0.022*  | 1.42                  | 0.99-2.58 | 0.035*  |
| <b>miR-451 expression</b>  |                     |           |         |                       |           |         |
| Low                        | 1(reference)        |           |         | 1(reference)          |           |         |
| High                       | 0.81                | 0.73-2.11 | 0.002*  | 0.84                  | 0.66-2.76 | 0.008*  |
| <b>NEDD9 expression</b>    |                     |           |         |                       |           |         |
| Low                        | 1(reference)        |           |         | 1(reference)          |           |         |
| High                       | 0.94                | 0.61-2.45 | 0.001*  | 0.71                  | 0.58-2.73 | 0.013*  |

OS: overall survival; mCRPC: metastatic castration-resistant prostate cancer; HR: hazard ratio; 95%CI: 95%confidence intervals; ECOG: Eastern Cooperative Oncology Group \*P<0.05.
